# Supplementary material for: Enhancing biodiversity with circular food systems
Source: Research Square preprint supplement (doi:10.21203/rs.3.rs-5261909/v1), 2024-12-09
Supplement: Supplementary file 1 [file 605e519cfb2a2d00275929ea.xlsx]

## Sheet: MaxBio_scoreTaxa
					ARTHROPODS	BIRDS	MAMMALS	EARTHWORMS	NEMATODES	BACTERIA	FUNGI
Western Europe	14	mineral	arable	No pest, NBF, Org fert, No till	2	3	1	3	4	3
Western Europe	14	mineral	pasture_marginal	No pest, NBF, Org fert, No till	2	3	1	3	4	3
Western Europe	17	mineral	arable	No pest, NBF, No till	0.99736	1.49604	0.49868	0.99736	1.49604	0.99736
Western Europe	17	mineral	arable	No pest, NBF, Org fert, No till	0.335973	0.50396	0.167987	0.50396	0.671947	0.50396
Western Europe	17	mineral	arable	No pest, NBF, Org fert, No till, Cov crop	0.666667	1	0.333333	1.33333	1.66667	1	0.333333
Western Europe	17	mineral	pasture_marginal	No pest, NBF, Org fert, No till	2	3	1	3	4	3
Western Europe	20	mineral	arable	No pest, NBF, Org fert, No till	0.0800237	0.120036	0.0400119	0.120036	0.160047	0.120036
Western Europe	20	mineral	arable	No pest, NBF, No tillage, Cov crop	1.91998	2.87996	0.959988	2.87996	3.83995	1.91998	0.959988
Western Europe	20	mineral	pasture_marginal	No pest, NBF, Org fert, No till	2	3	1	3	4	3
Western Europe	20	organic	arable	No pest, NBF, Org fert, No till	2	3	1	3	4	3
Western Europe	20	organic	pasture_marginal	No pest, NBF, Org fert, No till	2	3	1	3	4	3
Western Europe	21	mineral	arable	No pest, NBF, Org fert, No till	0.906586	1.35988	0.453293	1.35988	1.81317	1.35988
Western Europe	21	mineral	arable	No pest, NBF, No tillage, Cov crop	1	1.5	0.5	1.5	2	1	0.5
Western Europe	21	mineral	arable	No pest, NBF, Org fert, No till, Cov crop	0.093414	0.140121	0.046707	0.186828	0.233535	0.140121	0.046707
Western Europe	21	mineral	pasture_marginal	No pest, NBF, Org fert, No till	2	3	1	3	4	3
Western Europe	21	organic	arable	No pest, NBF, Org fert, No till	2	3	1	3	4	3
Western Europe	21	organic	pasture_marginal	No pest, NBF, Org fert, No till	2	3	1	3	4	3
Western Europe	24	mineral	arable	No pest, NBF, Org fert, No till	2	3	1	3	4	3
Western Europe	24	mineral	pasture_marginal	No pest, NBF, Org fert, No till	2	3	1	3	4	3
Western Europe	25	mineral	arable	No pest, NBF, Org fert, No till	2	3	1	3	4	3
Western Europe	25	mineral	pasture_marginal	No pest, NBF, Org fert, No till	2	3	1	3	4	3
Western Europe	26	mineral	arable	No pest, NBF, Org fert, No till	2	3	1	3	4	3
Western Europe	26	mineral	pasture_marginal	No pest, NBF, Org fert, No till	2	3	1	3	4	3
Western Europe	26	organic	arable	No pest, NBF, Org fert, No till	2	3	1	3	4	3
Western Europe	26	organic	pasture_marginal	No pest, NBF, Org fert, No till	2	3	1	3	4	3
Western Europe	27	mineral	arable	No pest, NBF, No till	1	1.5	0.5	1	1.5	1
Western Europe	27	mineral	arable	No pest, NBF, Org fert, No till	1	1.5	0.5	1.5	2	1.5
Western Europe	27	mineral	pasture_marginal	No pest, NBF, Org fert, No till	2	3	1	3	4	3
Western Europe	27	organic	arable	No pest, NBF, No till	1	1.5	0.5	1	1.5	1
Western Europe	27	organic	arable	No pest, NBF, Org fert, No till	1	1.5	0.5	1.5	2	1.5
Western Europe	27	organic	pasture_marginal	No pest, NBF, Org fert, No till	2	3	1	3	4	3
Western Europe	28	mineral	arable	No pest, NBF, No till	1	1.5	0.5	1	1.5	1
Western Europe	28	mineral	arable	No pest, NBF, Org fert, No till	1	1.5	0.5	1.5	2	1.5
Western Europe	28	mineral	pasture_marginal	No pest, NBF, Org fert, No till	2	3	1	3	4	3
Western Europe	28	organic	arable	No pest, NBF, Org fert, No till	2	3	1	3	4	3
Western Europe	28	organic	pasture_marginal	No pest, NBF, Org fert, No till	2	3	1	3	4	3
Western Europe	32	mineral	arable	No pest, NBF, Org fert, No till	2	3	1	3	4	3
Western Europe	32	mineral	pasture_marginal	No pest, NBF, Org fert, No till	2	3	1	3	4	3
Western Europe	32	organic	arable	No pest, NBF, Org fert, No till	2	3	1	3	4	3
Western Europe	32	organic	pasture_marginal	NBF, Org fert, No till	2	2	1	2	3	2
Western Europe	33	mineral	arable	No pest, NBF, No till	0.982578	1.47387	0.491289	0.982578	1.47387	0.982578
Western Europe	33	mineral	arable	No pest, NBF, Org fert, No till	1.01742	1.52613	0.508711	1.52613	2.03484	1.52613
Western Europe	33	mineral	pasture_marginal	No pest, NBF, Org fert, No till	2	3	1	3	4	3
Western Europe	11	mineral	arable	No pest, NBF, Org fert, No till	2	3	1	3	4	3
Western Europe	11	mineral	pasture_marginal	No pest, NBF, Org fert, No till	2	3	1	3	4	3
Western Europe	12	mineral	arable	No pest, NBF, Org fert, No till	2	3	1	3	4	3
Western Europe	12	mineral	pasture_marginal	No pest, NBF, Org fert, No till	2	3	1	3	4	3
Western Europe	15	mineral	arable	No pest, NBF, No till	0.0712612	0.106892	0.0356306	0.0712612	0.106892	0.0712612
Western Europe	15	mineral	arable	No pest, NBF, Org fert, No till	1.92874	2.89311	0.964369	2.89311	3.85748	2.89311
Western Europe	15	mineral	pasture_marginal	No pest, NBF, Org fert, No till	2	3	1	3	4	3
Eastern Europe	13	mineral	arable	No pest, NBF, Org fert, No till	2	3	1	3	4	3
Eastern Europe	13	mineral	pasture_marginal	No pest, NBF, Org fert, No till	2	3	1	3	4	3
Eastern Europe	14	mineral	arable	No pest, NBF, Org fert, No till	2	3	1	3	4	3
Eastern Europe	14	mineral	pasture_marginal	No pest, NBF, Org fert, No till	2	3	1	3	4	3
Eastern Europe	16	mineral	arable	No pest, NBF, Org fert, No till, Cov crop	2	3	1	4	5	3	1
Eastern Europe	16	mineral	pasture_marginal	NBF, Org fert, No till	2	2	1	2	3	2
Eastern Europe	16	mineral	rangeland	Org fert, No till	1	1		2	2	1
Eastern Europe	16	organic	arable	No pest, NBF, Org fert, No till, Cov crop	2	3	1	4	5	3	1
Eastern Europe	16	organic	pasture_marginal	No pest, NBF, Org fert, No till	2	3	1	3	4	3
Eastern Europe	16	organic	rangeland	NBF, Org fert, No till	2	2	1	2	3	2
Eastern Europe	17	mineral	arable	No pest, NBF, Org fert, No till, Cov crop	2	3	1	4	5	3	1
Eastern Europe	17	mineral	pasture_marginal	No pest, NBF, Org fert, No till	2	3	1	3	4	3
Eastern Europe	19	mineral	arable	No pest, NBF, Org fert, No till, Cov crop	2	3	1	4	5	3	1
Eastern Europe	19	mineral	pasture_marginal	No pest, NBF, Org fert, No till	2	3	1	3	4	3
Eastern Europe	20	mineral	arable	No pest, NBF, Org fert, No till	0.010782	0.016173	0.00539099	0.016173	0.0215639	0.016173
Eastern Europe	20	mineral	arable	No pest, NBF, No tillage, Cov crop	0.666667	1	0.333333	1	1.33333	0.666667	0.333333
Eastern Europe	20	mineral	arable	No pest, NBF, Org fert, No till, Cov crop	1.32255	1.98383	0.661276	2.6451	3.30638	1.98383	0.661276
Eastern Europe	20	mineral	pasture_marginal	No pest, NBF, Org fert, No till	2	3	1	3	4	3
Eastern Europe	20	organic	arable	No pest, NBF, Org fert, No till, Cov crop	2	3	1	4	5	3	1
Eastern Europe	20	organic	pasture_marginal	No pest, NBF, Org fert, No till	2	3	1	3	4	3
Eastern Europe	21	mineral	arable	No pest, NBF, Org fert, No till, Cov crop	2	3	1	4	5	3	1
Eastern Europe	21	mineral	pasture_marginal	No pest, NBF, Org fert, No till	2	3	1	3	4	3
Eastern Europe	21	organic	arable	No pest, NBF, No tillage, Cov crop	2	3	1	3	4	2	1
Eastern Europe	21	organic	pasture_marginal	No pest, NBF, Org fert, No till	2	3	1	3	4	3
Eastern Europe	23	mineral	arable	No pest, NBF, Org fert, No till	2	3	1	3	4	3
Eastern Europe	23	mineral	pasture_marginal	No pest, NBF, Org fert, No till	2	3	1	3	4	3
Eastern Europe	24	mineral	arable	No pest, NBF, Org fert, No till	2	3	1	3	4	3
Eastern Europe	24	mineral	pasture_marginal	No pest, NBF, Org fert, No till	2	3	1	3	4	3
Eastern Europe	25	mineral	arable	No pest, NBF, Org fert, No till	2	3	1	3	4	3
Eastern Europe	25	mineral	pasture_marginal	NBF, Org fert, No till	2	2	1	2	3	2
Eastern Europe	26	mineral	arable	No pest, NBF, Org fert, No till	2	3	1	3	4	3
Eastern Europe	26	mineral	pasture_marginal	NBF, Org fert, No till	2	2	1	2	3	2
Eastern Europe	26	mineral	pasture_marginal	No pest, NBF, Org fert, No till	-7.96e-14	-1.19e-13	-3.98e-14	-1.19e-13	-1.59e-13	-1.19e-13
Eastern Europe	27	mineral	arable	No pest, NBF, Org fert, No till	2	3	1	3	4	3
Eastern Europe	27	mineral	pasture_marginal	No pest, NBF, Org fert, No till	2	3	1	3	4	3
Eastern Europe	27	mineral	rangeland	NBF, Org fert, No till	2	2	1	2	3	2
Eastern Europe	27	organic	arable	No pest, NBF, No till	0.4929	0.73935	0.24645	0.4929	0.73935	0.4929
Eastern Europe	27	organic	arable	No pest, NBF, Org fert, No till	1.5071	2.26065	0.75355	2.26065	3.0142	2.26065
Eastern Europe	27	organic	pasture_marginal	No pest, NBF, Org fert, No till	2	3	1	3	4	3
Eastern Europe	27	organic	rangeland	NBF, Org fert, No till	2	2	1	2	3	2
Eastern Europe	28	mineral	arable	No pest, NBF, Org fert, No till	2	3	1	3	4	3
Eastern Europe	28	mineral	pasture_marginal	No pest, NBF, Org fert, No till	2	3	1	3	4	3
Eastern Europe	28	mineral	rangeland	NBF, Org fert, No till	2	2	1	2	3	2
Eastern Europe	28	organic	arable	No pest, NBF, Org fert, No till	2	3	1	3	4	3
Eastern Europe	28	organic	pasture_marginal	No pest, NBF, Org fert, No till	2	3	1	3	4	3
Eastern Europe	28	organic	rangeland	NBF, Org fert, No till	2	2	1	2	3	2
Eastern Europe	32	mineral	arable	No pest, NBF, Org fert, No till	2	3	1	3	4	3
Eastern Europe	33	mineral	arable	No pest, NBF, Org fert, No till	2	3	1	3	4	3
Eastern Europe	33	mineral	pasture_marginal	No pest, NBF, Org fert, No till	2	3	1	3	4	3
Eastern Europe	33	organic	arable	No pest, NBF, Org fert, No till	2	3	1	3	4	3
Eastern Europe	33	organic	pasture_marginal	No pest, NBF, Org fert, No till	2	3	1	3	4	3
Eastern Europe	33	organic	rangeland	NBF, Org fert, No till	2	2	1	2	3	2
Southern Europe	13	mineral	arable	No pest, NBF, No till	1	1.5	0.5	1	1.5	1
Southern Europe	13	mineral	arable	No pest, NBF, Org fert, No till	1	1.5	0.5	1.5	2	1.5
Southern Europe	13	mineral	pasture_marginal	No pest, NBF, Org fert, No till	2	3	1	3	4	3
Southern Europe	14	mineral	arable	No pest, NBF, Org fert, No till	2	3	1	3	4	3
Southern Europe	14	mineral	pasture_marginal	No pest, NBF, Org fert, No till	2	3	1	3	4	3
Southern Europe	16	mineral	arable	No pest, NBF, No till	1	1.5	0.5	1	1.5	1
Southern Europe	16	mineral	arable	No pest, NBF, Org fert, No till, Cov crop	1	1.5	0.5	2	2.5	1.5	0.5
Southern Europe	16	mineral	pasture_marginal	No pest, NBF, Org fert, No till	2	3	1	3	4	3
Southern Europe	17	mineral	arable	No pest, NBF, Org fert, No till	0.333333	0.5	0.166667	0.5	0.666667	0.5
Southern Europe	17	mineral	arable	No pest, NBF, Org fert, No till, Cov crop	1.66667	2.5	0.833333	3.33333	4.16667	2.5	0.833333
Southern Europe	17	mineral	pasture_marginal	No pest, NBF, Org fert, No till	2	3	1	3	4	3
Southern Europe	19	mineral	arable	No pest, NBF, No till	1	1.5	0.5	1	1.5	1
Southern Europe	19	mineral	arable	No pest, NBF, Org fert, No till, Cov crop	1	1.5	0.5	2	2.5	1.5	0.5
Southern Europe	19	mineral	pasture_marginal	No pest, NBF, Org fert, No till	2	3	1	3	4	3
Southern Europe	20	mineral	arable	No pest, NBF, Org fert, No till, Cov crop	2	3	1	4	5	3	1
Southern Europe	20	mineral	pasture_marginal	No pest, NBF, Org fert, No till	2	3	1	3	4	3
Southern Europe	21	mineral	arable	No pest, NBF, Org fert, No till, Cov crop	2	3	1	4	5	3	1
Southern Europe	21	mineral	pasture_marginal	No pest, NBF, Org fert, No till	2	3	1	3	4	3
Southern Europe	21	organic	arable	No pest, NBF, No tillage, Cov crop	1	1.5	0.5	1.5	2	1	0.5
Southern Europe	21	organic	arable	No pest, NBF, Org fert, No till, Cov crop	1	1.5	0.5	2	2.5	1.5	0.5
Southern Europe	21	organic	pasture_marginal	No pest, NBF, Org fert, No till	2	3	1	3	4	3
Southern Europe	24	mineral	arable	No pest, NBF, No till	2	3	1	2	3	2
Southern Europe	24	mineral	pasture_marginal	No pest, NBF, Org fert, No till	2	3	1	3	4	3
Southern Europe	25	mineral	arable	No pest, NBF, No till	1	1.5	0.5	1	1.5	1
Southern Europe	25	mineral	arable	No pest, NBF, Org fert, No till	1	1.5	0.5	1.5	2	1.5
Southern Europe	25	mineral	pasture_marginal	No pest, NBF, Org fert, No till	2	3	1	3	4	3
Southern Europe	26	mineral	arable	No pest, NBF, Org fert, No till	2	3	1	3	4	3
Southern Europe	26	mineral	pasture_marginal	No pest, NBF, Org fert, No till	2	3	1	3	4	3
Southern Europe	27	mineral	arable	No pest, NBF, No till	0.774186	1.16128	0.387093	0.774186	1.16128	0.774186
Southern Europe	27	mineral	arable	No pest, NBF, Org fert, No till	1.22581	1.83872	0.612907	1.83872	2.45163	1.83872
Southern Europe	27	mineral	pasture_marginal	No pest, NBF, Org fert, No till	2	3	1	3	4	3
Southern Europe	27	organic	arable	No pest, NBF, No till	1	1.5	0.5	1	1.5	1
Southern Europe	27	organic	arable	No pest, NBF, Org fert, No till	1	1.5	0.5	1.5	2	1.5
Southern Europe	27	organic	pasture_marginal	No pest, NBF, Org fert, No till	2	3	1	3	4	3
Southern Europe	28	mineral	arable	No pest, NBF, Org fert, No till	2	3	1	3	4	3
Southern Europe	28	mineral	pasture_marginal	No pest, NBF, Org fert, No till	2	3	1	3	4	3
Southern Europe	28	organic	arable	No pest, NBF, No till	1	1.5	0.5	1	1.5	1
Southern Europe	28	organic	arable	No pest, NBF, Org fert, No till	1	1.5	0.5	1.5	2	1.5
Southern Europe	28	organic	pasture_marginal	No pest, NBF, Org fert, No till	2	3	1	3	4	3
Southern Europe	32	mineral	arable	No pest, NBF, Org fert, No till	2	3	1	3	4	3
Southern Europe	32	mineral	pasture_marginal	No pest, NBF, Org fert, No till	2	3	1	3	4	3
Southern Europe	33	mineral	arable	No pest, NBF, Org fert, No till	2	3	1	3	4	3
Southern Europe	33	mineral	pasture_marginal	No pest, NBF, Org fert, No till	2	3	1	3	4	3
Southern Europe	31	mineral	arable	NBF, Org fert	1	1	1	1	2	2
Southern Europe	31	mineral	pasture_marginal	No pest, NBF, Org fert, No till	2	3	1	3	4	3
Southern Europe	7	mineral	arable	No pest, NBF, No till	2	3	1	2	3	2
Southern Europe	7	mineral	pasture_marginal	No pest, NBF, Org fert, No till	2	3	1	3	4	3
Southern Europe	8	mineral	arable	No pest, NBF, No till	2	3	1	2	3	2
Southern Europe	8	mineral	pasture_marginal	No pest, NBF, Org fert, No till	2	3	1	3	4	3
Southern Europe	10	mineral	arable	No pest, NBF, No till	0.991747	1.48762	0.495874	0.991747	1.48762	0.991747
Southern Europe	10	mineral	arable	No pest, NBF, Org fert, No till	1.00825	1.51238	0.504126	1.51238	2.01651	1.51238
Southern Europe	10	mineral	pasture_marginal	No pest, NBF, Org fert, No till	2	3	1	3	4	3
Southern Europe	11	mineral	arable	No pest, NBF, No till	0.205909	0.308864	0.102955	0.205909	0.308864	0.205909
Southern Europe	11	mineral	arable	No pest, NBF, Org fert, No till	1.79409	2.69114	0.897045	2.69114	3.58818	2.69114
Southern Europe	11	mineral	pasture_marginal	No pest, NBF, Org fert, No till	2	3	1	3	4	3
Southern Europe	12	mineral	arable	No pest, NBF, Org fert, No till	2	3	1	3	4	3
Southern Europe	12	mineral	pasture_marginal	No pest, NBF, Org fert, No till	2	3	1	3	4	3
Southern Europe	12	organic	arable	No pest, NBF, No till	1	1.5	0.5	1	1.5	1
Southern Europe	12	organic	arable	No pest, NBF, Org fert, No till	1	1.5	0.5	1.5	2	1.5
Southern Europe	12	organic	pasture_marginal	No pest, NBF, Org fert, No till	2	3	1	3	4	3
Southern Europe	15	mineral	arable	No pest, NBF, Org fert, No till	2	3	1	3	4	3
Southern Europe	15	mineral	pasture_marginal	No pest, NBF, Org fert, No till	2	3	1	3	4	3
Southern Europe	18	mineral	arable	No pest, NBF, Org fert, No till	0.333333	0.5	0.166667	0.5	0.666667	0.5
Southern Europe	18	mineral	arable	No pest, NBF, Org fert, No till, Cov crop	1.66667	2.5	0.833333	3.33333	4.16667	2.5	0.833333
Southern Europe	18	mineral	pasture_marginal	No pest, NBF, Org fert, No till	2	3	1	3	4	3
Southern Europe	29	mineral	arable	No pest, NBF, Org fert, No till	2	3	1	3	4	3
Northern Europe	19	mineral	arable	No pest, NBF, Org fert, No till	2	3	1	3	4	3
Northern Europe	20	mineral	arable	No pest, NBF, No tillage, Cov crop	1.36922	2.05384	0.684612	2.05384	2.73845	1.36922	0.684612
Northern Europe	20	mineral	arable	No pest, NBF, Org fert, No till, Cov crop	0.630776	0.946164	0.315388	1.26155	1.57694	0.946164	0.315388
Northern Europe	20	mineral	pasture_marginal	No pest, NBF, Org fert, No till	2	3	1	3	4	3
Northern Europe	20	organic	arable	No pest, NBF, Org fert, No till, Cov crop	2	3	1	4	5	3	1
Northern Europe	20	organic	pasture_marginal	No pest, NBF, Org fert, No till	2	3	1	3	4	3
Northern Europe	21	mineral	arable	No pest, NBF, Org fert, No till	0.174024	0.261035	0.0870118	0.261035	0.348047	0.261035
Northern Europe	21	mineral	arable	No pest, NBF, No tillage, Cov crop	1.15931	1.73896	0.579655	1.73896	2.31862	1.15931	0.579655
Northern Europe	21	mineral	arable	No pest, NBF, Org fert, No till, Cov crop	0.666667	1	0.333333	1.33333	1.66667	1	0.333333
Northern Europe	21	mineral	pasture_marginal	No pest, NBF, Org fert, No till	2	3	1	3	4	3
Northern Europe	21	mineral	rangeland	Org fert, No till	1	1		2	2	1
Northern Europe	21	organic	arable	No pest, NBF, Org fert, No till	0.333333	0.5	0.166667	0.5	0.666667	0.5
Northern Europe	21	organic	arable	No pest, NBF, Org fert, No till, Cov crop	1.66667	2.5	0.833333	3.33333	4.16667	2.5	0.833333
Northern Europe	21	organic	pasture_marginal	No pest, NBF, Org fert, No till	2	3	1	3	4	3
Northern Europe	23	mineral	arable	No pest, NBF, Org fert, No till	2	3	1	3	4	3
Northern Europe	23	mineral	pasture_marginal	No pest, NBF, Org fert, No till	2	3	1	3	4	3
Northern Europe	23	organic	arable	No pest, NBF, Org fert, No till	2	3	1	3	4	3
Northern Europe	23	organic	pasture_marginal	No pest, NBF, Org fert, No till	2	3	1	3	4	3
Northern Europe	24	mineral	arable	No pest, NBF, Org fert, No till	2	3	1	3	4	3
Northern Europe	24	mineral	pasture_marginal	No pest, NBF, Org fert, No till	2	3	1	3	4	3
Northern Europe	24	organic	arable	No pest, NBF, Org fert, No till	2	3	1	3	4	3
Northern Europe	24	organic	pasture_marginal	No pest, NBF, Org fert, No till	2	3	1	3	4	3
Northern Europe	25	mineral	arable	No pest, NBF, Org fert, No till	2	3	1	3	4	3
Northern Europe	25	organic	arable	No pest, NBF, Org fert, No till	2	3	1	3	4	3
Northern Europe	25	organic	pasture_marginal	No pest, NBF, Org fert, No till	2	3	1	3	4	3
Northern Europe	26	mineral	arable	No pest, NBF, Org fert, No till	2	3	1	3	4	3
Northern Europe	26	mineral	pasture_marginal	No pest, NBF, Org fert, No till	2	3	1	3	4	3
Northern Europe	26	mineral	rangeland	Org fert, No till	1	1		2	2	1
Northern Europe	26	organic	arable	No pest, NBF, Org fert, No till	2	3	1	3	4	3
Northern Europe	26	organic	pasture_marginal	No pest, NBF, Org fert, No till	2	3	1	3	4	3
Northern Europe	27	mineral	arable	No pest, NBF, Org fert, No till	2	3	1	3	4	3
Northern Europe	27	mineral	pasture_marginal	No pest, NBF, Org fert, No till	2	3	1	3	4	3
Northern Europe	27	organic	arable	No pest, NBF, Org fert, No till	2	3	1	3	4	3
Northern Europe	28	mineral	arable	No pest, NBF, Org fert, No till	2	3	1	3	4	3
Northern Europe	28	mineral	pasture_marginal	No pest, NBF, Org fert, No till	2	3	1	3	4	3
Northern Europe	28	organic	arable	No pest, NBF, Org fert, No till	2	3	1	3	4	3
Northern Europe	28	organic	pasture_marginal	No pest, NBF, Org fert, No till	2	3	1	3	4	3
Northern Europe	32	mineral	arable	No pest, NBF, Org fert, No till	2	3	1	3	4	3
Northern Europe	32	mineral	pasture_marginal	No pest, NBF, Org fert, No till	2	3	1	3	4	3
Northern Europe	32	organic	arable	No pest, NBF, Org fert, No till	2	3	1	3	4	3
Northern Europe	33	mineral	arable	No pest, NBF, Org fert, No till	2	3	1	3	4	3
Northern Europe	33	mineral	pasture_marginal	No pest, NBF, Org fert, No till	2	3	1	3	4	3
Northern Europe	33	mineral	rangeland	Org fert, No till	1	1		2	2	1
Northern Europe	33	organic	arable	No pest, NBF, Org fert, No till	2	3	1	3	4	3
Northern Europe	33	organic	pasture_marginal	No pest, NBF, Org fert, No till	2	3	1	3	4	3
Northern Europe	22	mineral	arable	No pest, NBF, Org fert, No till	2	3	1	3	4	3
Northern Europe	30	mineral	arable	No pest, NBF, Org fert, No till	2	3	1	3	4	3
Northern Europe	30	mineral	rangeland	Org fert, No till	1	1		2	2	1
Northern Europe	30	organic	arable	No pest, NBF, Org fert, No till	2	3	1	3	4	3
Northern Europe	31	mineral	arable	No pest, NBF, Org fert, No till	2	3	1	3	4	3
Northern Europe	31	mineral	rangeland	Org fert, No till	1	1		2	2	1

## Sheet: MaxBio_scorePractice
	C	Z	Soil	LandType	Practice	scenario	value	area_abs	area_proportion of total	unit
1	Eastern Europe	13	mineral	arable	No pest, NBF, Org fert, No till	MaxBio	16	6114	0.000155781	biodiv score
2	Eastern Europe	13	mineral	pasture_marginal	No pest, NBF, Org fert, No till	MaxBio	16	4867	0.000124008	biodiv score
3	Eastern Europe	14	mineral	arable	No pest, NBF, Org fert, No till	MaxBio	16	1122	2.85879e-05	biodiv score
4	Eastern Europe	14	mineral	pasture_marginal	No pest, NBF, Org fert, No till	MaxBio	16	110	2.80273e-06	biodiv score
5	Eastern Europe	16	mineral	arable	No pest, NBF, Org fert, No till, Cov crop	MaxBio	19	3117264	0.0794259	biodiv score
6	Eastern Europe	16	mineral	pasture_marginal	NBF, Org fert, No till	MaxBio	12	1041164	0.0265282	biodiv score
7	Eastern Europe	16	mineral	rangeland	Org fert, No till	MaxBio	7	136896	0.00348802	biodiv score
8	Eastern Europe	16	organic	arable	No pest, NBF, Org fert, No till, Cov crop	MaxBio	19	2178	5.54941e-05	biodiv score
9	Eastern Europe	16	organic	pasture_marginal	No pest, NBF, Org fert, No till	MaxBio	16	6769	0.00017247	biodiv score
10	Eastern Europe	16	organic	rangeland	NBF, Org fert, No till	MaxBio	12	48635	0.00123919	biodiv score
11	Eastern Europe	17	mineral	arable	No pest, NBF, Org fert, No till, Cov crop	MaxBio	19	1871732	0.0476906	biodiv score
12	Eastern Europe	17	mineral	pasture_marginal	No pest, NBF, Org fert, No till	MaxBio	16	695709	0.0177262	biodiv score
13	Eastern Europe	19	mineral	arable	No pest, NBF, Org fert, No till, Cov crop	MaxBio	19	493358	0.0125705	biodiv score
14	Eastern Europe	19	mineral	pasture_marginal	No pest, NBF, Org fert, No till	MaxBio	16	179395	0.00457087	biodiv score
15	Eastern Europe	20	mineral	arable	No pest, NBF, No tillage, Cov crop	MaxBio	5.33333	17476753	0.445297	biodiv score
16	Eastern Europe	20	mineral	arable	No pest, NBF, Org fert, No till	MaxBio	0.0862558	17476753	0.445297	biodiv score
17	Eastern Europe	20	mineral	arable	No pest, NBF, Org fert, No till, Cov crop	MaxBio	12.5642	17476753	0.445297	biodiv score
18	Eastern Europe	20	mineral	pasture_marginal	No pest, NBF, Org fert, No till	MaxBio	16	7363198	0.18761	biodiv score
19	Eastern Europe	20	organic	arable	No pest, NBF, Org fert, No till, Cov crop	MaxBio	19	177843	0.00453133	biodiv score
20	Eastern Europe	20	organic	pasture_marginal	No pest, NBF, Org fert, No till	MaxBio	16	137429	0.0035016	biodiv score
21	Eastern Europe	21	mineral	arable	No pest, NBF, Org fert, No till, Cov crop	MaxBio	19	454408	0.011578	biodiv score
22	Eastern Europe	21	mineral	pasture_marginal	No pest, NBF, Org fert, No till	MaxBio	16	500368	0.0127491	biodiv score
23	Eastern Europe	21	organic	arable	No pest, NBF, No tillage, Cov crop	MaxBio	16	1559	3.97223e-05	biodiv score
24	Eastern Europe	21	organic	pasture_marginal	No pest, NBF, Org fert, No till	MaxBio	16	377	9.60572e-06	biodiv score
25	Eastern Europe	23	mineral	arable	No pest, NBF, Org fert, No till	MaxBio	16	484	1.2332e-05	biodiv score
26	Eastern Europe	23	mineral	pasture_marginal	No pest, NBF, Org fert, No till	MaxBio	16	2879	7.33551e-05	biodiv score
27	Eastern Europe	24	mineral	arable	No pest, NBF, Org fert, No till	MaxBio	16	2269	5.78127e-05	biodiv score
28	Eastern Europe	24	mineral	pasture_marginal	No pest, NBF, Org fert, No till	MaxBio	16	1430	3.64355e-05	biodiv score
29	Eastern Europe	25	mineral	arable	No pest, NBF, Org fert, No till	MaxBio	16	4440	0.000113128	biodiv score
30	Eastern Europe	25	mineral	pasture_marginal	NBF, Org fert, No till	MaxBio	12	16927	0.000431289	biodiv score
31	Eastern Europe	26	mineral	arable	No pest, NBF, Org fert, No till	MaxBio	16	87004	0.00221681	biodiv score
32	Eastern Europe	26	mineral	pasture_marginal	NBF, Org fert, No till	MaxBio	12	146222	0.00372564	biodiv score
33	Eastern Europe	26	mineral	pasture_marginal	No pest, NBF, Org fert, No till	MaxBio	-6.36924e-13	146222	0.00372564	biodiv score
34	Eastern Europe	27	mineral	arable	No pest, NBF, Org fert, No till	MaxBio	16	3.00862e+06	0.0766578	biodiv score
35	Eastern Europe	27	mineral	pasture_marginal	No pest, NBF, Org fert, No till	MaxBio	16	370142	0.00943099	biodiv score
36	Eastern Europe	27	mineral	rangeland	NBF, Org fert, No till	MaxBio	12	4102	0.000104516	biodiv score
37	Eastern Europe	27	organic	arable	No pest, NBF, No till	MaxBio	3.20385	8512	0.00021688	biodiv score
38	Eastern Europe	27	organic	arable	No pest, NBF, Org fert, No till	MaxBio	12.0568	8512	0.00021688	biodiv score
39	Eastern Europe	27	organic	pasture_marginal	No pest, NBF, Org fert, No till	MaxBio	16	1299	3.30977e-05	biodiv score
40	Eastern Europe	27	organic	rangeland	NBF, Org fert, No till	MaxBio	12	3617	9.21589e-05	biodiv score
41	Eastern Europe	28	mineral	arable	No pest, NBF, Org fert, No till	MaxBio	16	1136431	0.0289555	biodiv score
42	Eastern Europe	28	mineral	pasture_marginal	No pest, NBF, Org fert, No till	MaxBio	16	297655	0.00758406	biodiv score
43	Eastern Europe	28	mineral	rangeland	NBF, Org fert, No till	MaxBio	12	51964	0.00132401	biodiv score
44	Eastern Europe	28	organic	arable	No pest, NBF, Org fert, No till	MaxBio	16	73160	0.00186407	biodiv score
45	Eastern Europe	28	organic	pasture_marginal	No pest, NBF, Org fert, No till	MaxBio	16	32583	0.000830194	biodiv score
46	Eastern Europe	28	organic	rangeland	NBF, Org fert, No till	MaxBio	12	263518	0.00671427	biodiv score
47	Eastern Europe	32	mineral	arable	No pest, NBF, Org fert, No till	MaxBio	16	5313	0.000135372	biodiv score
48	Eastern Europe	33	mineral	arable	No pest, NBF, Org fert, No till	MaxBio	16	4882	0.00012439	biodiv score
49	Eastern Europe	33	mineral	pasture_marginal	No pest, NBF, Org fert, No till	MaxBio	16	1460	3.71999e-05	biodiv score
50	Eastern Europe	33	organic	arable	No pest, NBF, Org fert, No till	MaxBio	16	582	1.4829e-05	biodiv score
51	Eastern Europe	33	organic	pasture_marginal	No pest, NBF, Org fert, No till	MaxBio	16	652	1.66125e-05	biodiv score
52	Eastern Europe	33	organic	rangeland	NBF, Org fert, No till	MaxBio	12	4039	0.000102911	biodiv score
53	Northern Europe	19	mineral	arable	No pest, NBF, Org fert, No till	MaxBio	16	95445	0.00282639	biodiv score
54	Northern Europe	20	mineral	arable	No pest, NBF, No tillage, Cov crop	MaxBio	10.9538	6.0704e+06	0.179761	biodiv score
55	Northern Europe	20	mineral	arable	No pest, NBF, Org fert, No till, Cov crop	MaxBio	5.99237	6.0704e+06	0.179761	biodiv score
56	Northern Europe	20	mineral	pasture_marginal	No pest, NBF, Org fert, No till	MaxBio	16	1365284	0.0404299	biodiv score
57	Northern Europe	20	organic	arable	No pest, NBF, Org fert, No till, Cov crop	MaxBio	19	111736	0.00330882	biodiv score
58	Northern Europe	20	organic	pasture_marginal	No pest, NBF, Org fert, No till	MaxBio	16	36981	0.00109511	biodiv score
59	Northern Europe	21	mineral	arable	No pest, NBF, No tillage, Cov crop	MaxBio	9.27448	6100770	0.180661	biodiv score
60	Northern Europe	21	mineral	arable	No pest, NBF, Org fert, No till	MaxBio	1.39219	6100770	0.180661	biodiv score
61	Northern Europe	21	mineral	arable	No pest, NBF, Org fert, No till, Cov crop	MaxBio	6.33333	6100770	0.180661	biodiv score
62	Northern Europe	21	mineral	pasture_marginal	No pest, NBF, Org fert, No till	MaxBio	16	14242204	0.421751	biodiv score
63	Northern Europe	21	mineral	rangeland	Org fert, No till	MaxBio	7	98	2.90205e-06	biodiv score
64	Northern Europe	21	organic	arable	No pest, NBF, Org fert, No till	MaxBio	2.66667	149556	0.00442877	biodiv score
65	Northern Europe	21	organic	arable	No pest, NBF, Org fert, No till, Cov crop	MaxBio	15.8333	149556	0.00442877	biodiv score
66	Northern Europe	21	organic	pasture_marginal	No pest, NBF, Org fert, No till	MaxBio	16	1018977	0.0301748	biodiv score
67	Northern Europe	22	mineral	arable	No pest, NBF, Org fert, No till	MaxBio	16	28696	0.000849769	biodiv score
68	Northern Europe	23	mineral	arable	No pest, NBF, Org fert, No till	MaxBio	16	67804	0.00200787	biodiv score
69	Northern Europe	23	mineral	pasture_marginal	No pest, NBF, Org fert, No till	MaxBio	16	717	2.12324e-05	biodiv score
70	Northern Europe	23	organic	arable	No pest, NBF, Org fert, No till	MaxBio	16	16968	0.00050247	biodiv score
71	Northern Europe	23	organic	pasture_marginal	No pest, NBF, Org fert, No till	MaxBio	16	65	1.92483e-06	biodiv score
72	Northern Europe	24	mineral	arable	No pest, NBF, Org fert, No till	MaxBio	16	502817	0.0148898	biodiv score
73	Northern Europe	24	mineral	pasture_marginal	No pest, NBF, Org fert, No till	MaxBio	16	45236	0.00133956	biodiv score
74	Northern Europe	24	organic	arable	No pest, NBF, Org fert, No till	MaxBio	16	70927	0.00210035	biodiv score
75	Northern Europe	24	organic	pasture_marginal	No pest, NBF, Org fert, No till	MaxBio	16	19426	0.000575258	biodiv score
76	Northern Europe	25	mineral	arable	No pest, NBF, Org fert, No till	MaxBio	16	25192	0.000746005	biodiv score
77	Northern Europe	25	organic	arable	No pest, NBF, Org fert, No till	MaxBio	16	11074	0.000327932	biodiv score
78	Northern Europe	25	organic	pasture_marginal	No pest, NBF, Org fert, No till	MaxBio	16	2304	6.82279e-05	biodiv score
79	Northern Europe	26	mineral	arable	No pest, NBF, Org fert, No till	MaxBio	16	253138	0.00749612	biodiv score
80	Northern Europe	26	mineral	pasture_marginal	No pest, NBF, Org fert, No till	MaxBio	16	273028	0.00808512	biodiv score
81	Northern Europe	26	mineral	rangeland	Org fert, No till	MaxBio	7	172	5.0934e-06	biodiv score
82	Northern Europe	26	organic	arable	No pest, NBF, Org fert, No till	MaxBio	16	31434	0.000930849	biodiv score
83	Northern Europe	26	organic	pasture_marginal	No pest, NBF, Org fert, No till	MaxBio	16	26779	0.000793001	biodiv score
84	Northern Europe	27	mineral	arable	No pest, NBF, Org fert, No till	MaxBio	16	449310	0.0133053	biodiv score
85	Northern Europe	27	mineral	pasture_marginal	No pest, NBF, Org fert, No till	MaxBio	16	55179	0.001634	biodiv score
86	Northern Europe	27	organic	arable	No pest, NBF, Org fert, No till	MaxBio	16	16819	0.000498058	biodiv score
87	Northern Europe	28	mineral	arable	No pest, NBF, Org fert, No till	MaxBio	16	1568357	0.0464434	biodiv score
88	Northern Europe	28	mineral	pasture_marginal	No pest, NBF, Org fert, No till	MaxBio	16	339348	0.010049	biodiv score
89	Northern Europe	28	organic	arable	No pest, NBF, Org fert, No till	MaxBio	16	113177	0.00335149	biodiv score
90	Northern Europe	28	organic	pasture_marginal	No pest, NBF, Org fert, No till	MaxBio	16	45439	0.00134558	biodiv score
91	Northern Europe	30	mineral	arable	No pest, NBF, Org fert, No till	MaxBio	16	43044	0.00127465	biodiv score
92	Northern Europe	30	mineral	rangeland	Org fert, No till	MaxBio	7	1067	3.15969e-05	biodiv score
93	Northern Europe	30	organic	arable	No pest, NBF, Org fert, No till	MaxBio	16	13048	0.000386388	biodiv score
94	Northern Europe	31	mineral	arable	No pest, NBF, Org fert, No till	MaxBio	16	31296	0.000926762	biodiv score
95	Northern Europe	31	mineral	rangeland	Org fert, No till	MaxBio	7	4225	0.000125114	biodiv score
96	Northern Europe	32	mineral	arable	No pest, NBF, Org fert, No till	MaxBio	16	231399	0.00685237	biodiv score
97	Northern Europe	32	mineral	pasture_marginal	No pest, NBF, Org fert, No till	MaxBio	16	1703	5.04306e-05	biodiv score
98	Northern Europe	32	organic	arable	No pest, NBF, Org fert, No till	MaxBio	16	16208	0.000479964	biodiv score
99	Northern Europe	33	mineral	arable	No pest, NBF, Org fert, No till	MaxBio	16	216874	0.00642224	biodiv score
100	Northern Europe	33	mineral	pasture_marginal	No pest, NBF, Org fert, No till	MaxBio	16	23435	0.000693976	biodiv score
101	Northern Europe	33	mineral	rangeland	Org fert, No till	MaxBio	7	179	5.30069e-06	biodiv score
102	Northern Europe	33	organic	arable	No pest, NBF, Org fert, No till	MaxBio	16	30170	0.000893418	biodiv score
103	Northern Europe	33	organic	pasture_marginal	No pest, NBF, Org fert, No till	MaxBio	16	1687	4.99568e-05	biodiv score
104	Southern Europe	10	mineral	arable	No pest, NBF, No till	MaxBio	6.44636	325975	0.00653222	biodiv score
105	Southern Europe	10	mineral	arable	No pest, NBF, Org fert, No till	MaxBio	8.06602	325975	0.00653222	biodiv score
106	Southern Europe	10	mineral	pasture_marginal	No pest, NBF, Org fert, No till	MaxBio	16	3050	6.1119e-05	biodiv score
107	Southern Europe	11	mineral	arable	No pest, NBF, No till	MaxBio	1.33841	9.09531e+06	0.182261	biodiv score
108	Southern Europe	11	mineral	arable	No pest, NBF, Org fert, No till	MaxBio	14.3527	9.09531e+06	0.182261	biodiv score
109	Southern Europe	11	mineral	pasture_marginal	No pest, NBF, Org fert, No till	MaxBio	16	9246858	0.185298	biodiv score
110	Southern Europe	12	mineral	arable	No pest, NBF, Org fert, No till	MaxBio	16	595844	0.0119401	biodiv score
111	Southern Europe	12	mineral	pasture_marginal	No pest, NBF, Org fert, No till	MaxBio	16	520892	0.0104382	biodiv score
112	Southern Europe	12	organic	arable	No pest, NBF, No till	MaxBio	6.5	1592	3.19021e-05	biodiv score
113	Southern Europe	12	organic	arable	No pest, NBF, Org fert, No till	MaxBio	8	1592	3.19021e-05	biodiv score
114	Southern Europe	12	organic	pasture_marginal	No pest, NBF, Org fert, No till	MaxBio	16	4608	9.23398e-05	biodiv score
115	Southern Europe	13	mineral	arable	No pest, NBF, No till	MaxBio	6.5	2261614	0.0453205	biodiv score
116	Southern Europe	13	mineral	arable	No pest, NBF, Org fert, No till	MaxBio	8	2261614	0.0453205	biodiv score
117	Southern Europe	13	mineral	pasture_marginal	No pest, NBF, Org fert, No till	MaxBio	16	1130685	0.0226578	biodiv score
118	Southern Europe	14	mineral	arable	No pest, NBF, Org fert, No till	MaxBio	16	4646078	0.0931028	biodiv score
119	Southern Europe	14	mineral	pasture_marginal	No pest, NBF, Org fert, No till	MaxBio	16	3411838	0.0683699	biodiv score
120	Southern Europe	15	mineral	arable	No pest, NBF, Org fert, No till	MaxBio	16	185861	0.00372447	biodiv score
121	Southern Europe	15	mineral	pasture_marginal	No pest, NBF, Org fert, No till	MaxBio	16	374570	0.00750601	biodiv score
122	Southern Europe	16	mineral	arable	No pest, NBF, No till	MaxBio	6.5	280145	0.00561383	biodiv score
123	Southern Europe	16	mineral	arable	No pest, NBF, Org fert, No till, Cov crop	MaxBio	9.5	280145	0.00561383	biodiv score
124	Southern Europe	16	mineral	pasture_marginal	No pest, NBF, Org fert, No till	MaxBio	16	111479	0.00223393	biodiv score
125	Southern Europe	17	mineral	arable	No pest, NBF, Org fert, No till	MaxBio	2.66667	823313	0.0164984	biodiv score
126	Southern Europe	17	mineral	arable	No pest, NBF, Org fert, No till, Cov crop	MaxBio	15.8333	823313	0.0164984	biodiv score
127	Southern Europe	17	mineral	pasture_marginal	No pest, NBF, Org fert, No till	MaxBio	16	131498	0.00263509	biodiv score
128	Southern Europe	18	mineral	arable	No pest, NBF, Org fert, No till	MaxBio	2.66667	133900	0.00268322	biodiv score
129	Southern Europe	18	mineral	arable	No pest, NBF, Org fert, No till, Cov crop	MaxBio	15.8333	133900	0.00268322	biodiv score
130	Southern Europe	18	mineral	pasture_marginal	No pest, NBF, Org fert, No till	MaxBio	16	11645	0.000233354	biodiv score
131	Southern Europe	19	mineral	arable	No pest, NBF, No till	MaxBio	6.5	62100	0.00124442	biodiv score
132	Southern Europe	19	mineral	arable	No pest, NBF, Org fert, No till, Cov crop	MaxBio	9.5	62100	0.00124442	biodiv score
133	Southern Europe	19	mineral	pasture_marginal	No pest, NBF, Org fert, No till	MaxBio	16	32315	0.000647561	biodiv score
134	Southern Europe	20	mineral	arable	No pest, NBF, Org fert, No till, Cov crop	MaxBio	19	440213	0.00882143	biodiv score
135	Southern Europe	20	mineral	pasture_marginal	No pest, NBF, Org fert, No till	MaxBio	16	259332	0.00519676	biodiv score
136	Southern Europe	21	mineral	arable	No pest, NBF, Org fert, No till, Cov crop	MaxBio	19	324162	0.00649589	biodiv score
137	Southern Europe	21	mineral	pasture_marginal	No pest, NBF, Org fert, No till	MaxBio	16	432285	0.00866256	biodiv score
138	Southern Europe	21	organic	arable	No pest, NBF, No tillage, Cov crop	MaxBio	8	979	1.96182e-05	biodiv score
139	Southern Europe	21	organic	arable	No pest, NBF, Org fert, No till, Cov crop	MaxBio	9.5	979	1.96182e-05	biodiv score
140	Southern Europe	21	organic	pasture_marginal	No pest, NBF, Org fert, No till	MaxBio	16	9038	0.000181113	biodiv score
141	Southern Europe	24	mineral	arable	No pest, NBF, No till	MaxBio	13	233	4.66909e-06	biodiv score
142	Southern Europe	24	mineral	pasture_marginal	No pest, NBF, Org fert, No till	MaxBio	16	2652	5.31435e-05	biodiv score
143	Southern Europe	25	mineral	arable	No pest, NBF, No till	MaxBio	6.5	123649	0.0024778	biodiv score
144	Southern Europe	25	mineral	arable	No pest, NBF, Org fert, No till	MaxBio	8	123649	0.0024778	biodiv score
145	Southern Europe	25	mineral	pasture_marginal	No pest, NBF, Org fert, No till	MaxBio	16	888024	0.0177951	biodiv score
146	Southern Europe	26	mineral	arable	No pest, NBF, Org fert, No till	MaxBio	16	771111	0.0154523	biodiv score
147	Southern Europe	26	mineral	pasture_marginal	No pest, NBF, Org fert, No till	MaxBio	16	2778942	0.0556872	biodiv score
148	Southern Europe	27	mineral	arable	No pest, NBF, No till	MaxBio	5.03221	8.28057e+06	0.165934	biodiv score
149	Southern Europe	27	mineral	arable	No pest, NBF, Org fert, No till	MaxBio	9.80651	8.28057e+06	0.165934	biodiv score
150	Southern Europe	27	mineral	pasture_marginal	No pest, NBF, Org fert, No till	MaxBio	16	1868156	0.037436	biodiv score
151	Southern Europe	27	organic	arable	No pest, NBF, No till	MaxBio	6.5	47559	0.000953035	biodiv score
152	Southern Europe	27	organic	arable	No pest, NBF, Org fert, No till	MaxBio	8	47559	0.000953035	biodiv score
153	Southern Europe	27	organic	pasture_marginal	No pest, NBF, Org fert, No till	MaxBio	16	2293	4.59494e-05	biodiv score
154	Southern Europe	28	mineral	arable	No pest, NBF, Org fert, No till	MaxBio	16	211548	0.00423921	biodiv score
155	Southern Europe	28	mineral	pasture_marginal	No pest, NBF, Org fert, No till	MaxBio	16	16170	0.000324031	biodiv score
156	Southern Europe	28	organic	arable	No pest, NBF, No till	MaxBio	6.5	1223	2.45077e-05	biodiv score
157	Southern Europe	28	organic	arable	No pest, NBF, Org fert, No till	MaxBio	8	1223	2.45077e-05	biodiv score
158	Southern Europe	28	organic	pasture_marginal	No pest, NBF, Org fert, No till	MaxBio	16	3152	6.3163e-05	biodiv score
159	Southern Europe	29	mineral	arable	No pest, NBF, Org fert, No till	MaxBio	16	3835	7.68496e-05	biodiv score
160	Southern Europe	31	mineral	arable	NBF, Org fert	MaxBio	8	324	6.49264e-06	biodiv score
161	Southern Europe	31	mineral	pasture_marginal	No pest, NBF, Org fert, No till	MaxBio	16	7711	0.000154521	biodiv score
162	Southern Europe	32	mineral	arable	No pest, NBF, Org fert, No till	MaxBio	16	17330	0.000347276	biodiv score
163	Southern Europe	32	mineral	pasture_marginal	No pest, NBF, Org fert, No till	MaxBio	16	690	1.38269e-05	biodiv score
164	Southern Europe	33	mineral	arable	No pest, NBF, Org fert, No till	MaxBio	16	5780	0.000115825	biodiv score
165	Southern Europe	33	mineral	pasture_marginal	No pest, NBF, Org fert, No till	MaxBio	16	6187	0.000123981	biodiv score
166	Southern Europe	7	mineral	arable	No pest, NBF, No till	MaxBio	13	5365	0.000107509	biodiv score
167	Southern Europe	7	mineral	pasture_marginal	No pest, NBF, Org fert, No till	MaxBio	16	528	1.05806e-05	biodiv score
168	Southern Europe	8	mineral	arable	No pest, NBF, No till	MaxBio	13	121	2.42472e-06	biodiv score
169	Southern Europe	8	mineral	pasture_marginal	No pest, NBF, Org fert, No till	MaxBio	16	2333	4.6751e-05	biodiv score
170	Western Europe	11	mineral	arable	No pest, NBF, Org fert, No till	MaxBio	16	264136	0.00541194	biodiv score
171	Western Europe	11	mineral	pasture_marginal	No pest, NBF, Org fert, No till	MaxBio	16	112895	0.00231313	biodiv score
172	Western Europe	12	mineral	arable	No pest, NBF, Org fert, No till	MaxBio	16	511988	0.0104902	biodiv score
173	Western Europe	12	mineral	pasture_marginal	No pest, NBF, Org fert, No till	MaxBio	16	251772	0.00515861	biodiv score
174	Western Europe	14	mineral	arable	No pest, NBF, Org fert, No till	MaxBio	16	344425	0.00705699	biodiv score
175	Western Europe	14	mineral	pasture_marginal	No pest, NBF, Org fert, No till	MaxBio	16	368793	0.00755627	biodiv score
176	Western Europe	15	mineral	arable	No pest, NBF, No till	MaxBio	0.463198	1432827	0.0293575	biodiv score
177	Western Europe	15	mineral	arable	No pest, NBF, Org fert, No till	MaxBio	15.4299	1432827	0.0293575	biodiv score
178	Western Europe	15	mineral	pasture_marginal	No pest, NBF, Org fert, No till	MaxBio	16	930850	0.0190724	biodiv score
179	Western Europe	17	mineral	arable	No pest, NBF, No till	MaxBio	6.48284	13842	0.000283611	biodiv score
180	Western Europe	17	mineral	arable	No pest, NBF, Org fert, No till	MaxBio	2.68779	13842	0.000283611	biodiv score
181	Western Europe	17	mineral	arable	No pest, NBF, Org fert, No till, Cov crop	MaxBio	6.33333	13842	0.000283611	biodiv score
182	Western Europe	17	mineral	pasture_marginal	No pest, NBF, Org fert, No till	MaxBio	16	7967	0.000163237	biodiv score
183	Western Europe	20	mineral	arable	No pest, NBF, No tillage, Cov crop	MaxBio	15.3598	14702895	0.301251	biodiv score
184	Western Europe	20	mineral	arable	No pest, NBF, Org fert, No till	MaxBio	0.64019	14702895	0.301251	biodiv score
185	Western Europe	20	mineral	pasture_marginal	No pest, NBF, Org fert, No till	MaxBio	16	4778766	0.0979131	biodiv score
186	Western Europe	20	organic	arable	No pest, NBF, Org fert, No till	MaxBio	16	274083	0.00561574	biodiv score
187	Western Europe	20	organic	pasture_marginal	No pest, NBF, Org fert, No till	MaxBio	16	93849	0.00192289	biodiv score
188	Western Europe	21	mineral	arable	No pest, NBF, No tillage, Cov crop	MaxBio	8	10034343	0.205596	biodiv score
189	Western Europe	21	mineral	arable	No pest, NBF, Org fert, No till	MaxBio	7.25269	10034343	0.205596	biodiv score
190	Western Europe	21	mineral	arable	No pest, NBF, Org fert, No till, Cov crop	MaxBio	0.887433	10034343	0.205596	biodiv score
191	Western Europe	21	mineral	pasture_marginal	No pest, NBF, Org fert, No till	MaxBio	16	8228487	0.168595	biodiv score
192	Western Europe	21	organic	arable	No pest, NBF, Org fert, No till	MaxBio	16	163235	0.00334455	biodiv score
193	Western Europe	21	organic	pasture_marginal	No pest, NBF, Org fert, No till	MaxBio	16	210320	0.00430929	biodiv score
194	Western Europe	24	mineral	arable	No pest, NBF, Org fert, No till	MaxBio	16	131	2.68409e-06	biodiv score
195	Western Europe	24	mineral	pasture_marginal	No pest, NBF, Org fert, No till	MaxBio	16	4609	9.44347e-05	biodiv score
196	Western Europe	25	mineral	arable	No pest, NBF, Org fert, No till	MaxBio	16	18945	0.000388168	biodiv score
197	Western Europe	25	mineral	pasture_marginal	No pest, NBF, Org fert, No till	MaxBio	16	437486	0.00896374	biodiv score
198	Western Europe	26	mineral	arable	No pest, NBF, Org fert, No till	MaxBio	16	561895	0.0115128	biodiv score
199	Western Europe	26	mineral	pasture_marginal	No pest, NBF, Org fert, No till	MaxBio	16	172794	0.00354041	biodiv score
200	Western Europe	26	organic	arable	No pest, NBF, Org fert, No till	MaxBio	16	324	6.6385e-06	biodiv score
201	Western Europe	26	organic	pasture_marginal	No pest, NBF, Org fert, No till	MaxBio	16	2628	5.38456e-05	biodiv score
202	Western Europe	27	mineral	arable	No pest, NBF, No till	MaxBio	6.5	2367156	0.0485011	biodiv score
203	Western Europe	27	mineral	arable	No pest, NBF, Org fert, No till	MaxBio	8	2367156	0.0485011	biodiv score
204	Western Europe	27	mineral	pasture_marginal	No pest, NBF, Org fert, No till	MaxBio	16	607717	0.0124516	biodiv score
205	Western Europe	27	organic	arable	No pest, NBF, No till	MaxBio	6.5	21671	0.000444021	biodiv score
206	Western Europe	27	organic	arable	No pest, NBF, Org fert, No till	MaxBio	8	21671	0.000444021	biodiv score
207	Western Europe	27	organic	pasture_marginal	No pest, NBF, Org fert, No till	MaxBio	16	17442	0.000357373	biodiv score
208	Western Europe	28	mineral	arable	No pest, NBF, No till	MaxBio	6.5	731385	0.0149855	biodiv score
209	Western Europe	28	mineral	arable	No pest, NBF, Org fert, No till	MaxBio	8	731385	0.0149855	biodiv score
210	Western Europe	28	mineral	pasture_marginal	No pest, NBF, Org fert, No till	MaxBio	16	413454	0.00847134	biodiv score
211	Western Europe	28	organic	arable	No pest, NBF, Org fert, No till	MaxBio	16	265689	0.00544375	biodiv score
212	Western Europe	28	organic	pasture_marginal	No pest, NBF, Org fert, No till	MaxBio	16	416171	0.00852701	biodiv score
213	Western Europe	32	mineral	arable	No pest, NBF, Org fert, No till	MaxBio	16	28055	0.000574824	biodiv score
214	Western Europe	32	mineral	pasture_marginal	No pest, NBF, Org fert, No till	MaxBio	16	257	5.26572e-06	biodiv score
215	Western Europe	32	organic	arable	No pest, NBF, Org fert, No till	MaxBio	16	426	8.7284e-06	biodiv score
216	Western Europe	32	organic	pasture_marginal	NBF, Org fert, No till	MaxBio	12	191	3.91344e-06	biodiv score
217	Western Europe	33	mineral	arable	No pest, NBF, No till	MaxBio	6.38676	7858	0.000161004	biodiv score
218	Western Europe	33	mineral	arable	No pest, NBF, Org fert, No till	MaxBio	8.13938	7858	0.000161004	biodiv score
219	Western Europe	33	mineral	pasture_marginal	No pest, NBF, Org fert, No till	MaxBio	16	4445	9.10745e-05	biodiv score

## Sheet: Agribase_scoreTaxa
Western Europe	14	mineral	arable	No pest, Org fert	BIRDS	-3.30077e-17
Western Europe	14	mineral	arable	No pest, Org fert	EARTHWORMS	-6.60154e-17
Western Europe	14	mineral	arable	No pest, Org fert	NEMATODES	-6.60154e-17
Western Europe	14	mineral	arable	No pest, Org fert	BACTERIA	-6.60154e-17
Western Europe	17	mineral	arable	No pest, Org fert	BIRDS	-1.57693e-13
Western Europe	17	mineral	arable	No pest, Org fert	EARTHWORMS	-3.15386e-13
Western Europe	17	mineral	arable	No pest, Org fert	NEMATODES	-3.15386e-13
Western Europe	17	mineral	arable	No pest, Org fert	BACTERIA	-3.15386e-13
Western Europe	25	mineral	arable	No pest, Org fert	BIRDS	40.3899
Western Europe	25	mineral	arable	No pest, Org fert	EARTHWORMS	80.7797
Western Europe	25	mineral	arable	No pest, Org fert	NEMATODES	80.7797
Western Europe	25	mineral	arable	No pest, Org fert	BACTERIA	80.7797
Western Europe	25	organic	arable	No pest, Org fert	BIRDS	9.09495e-11
Western Europe	25	organic	arable	No pest, Org fert	EARTHWORMS	1.81899e-10
Western Europe	25	organic	arable	No pest, Org fert	NEMATODES	1.81899e-10
Western Europe	25	organic	arable	No pest, Org fert	BACTERIA	1.81899e-10
Western Europe	26	mineral	arable	No pest, Org fert	BIRDS	0.33977
Western Europe	26	mineral	arable	No pest, Org fert	EARTHWORMS	0.67954
Western Europe	26	mineral	arable	No pest, Org fert	NEMATODES	0.67954
Western Europe	26	mineral	arable	No pest, Org fert	BACTERIA	0.67954
Western Europe	26	organic	arable	No pest, Org fert	BIRDS	1.03704
Western Europe	26	organic	arable	No pest, Org fert	EARTHWORMS	2.07407
Western Europe	26	organic	arable	No pest, Org fert	NEMATODES	2.07407
Western Europe	26	organic	arable	No pest, Org fert	BACTERIA	2.07407
Western Europe	32	mineral	arable	No pest, Org fert	BIRDS	1.78499
Western Europe	32	mineral	arable	No pest, Org fert	EARTHWORMS	3.56999
Western Europe	32	mineral	arable	No pest, Org fert	NEMATODES	3.56999
Western Europe	32	mineral	arable	No pest, Org fert	BACTERIA	3.56999
Western Europe	32	mineral	pasture_marginal	No pest, Org fert	BIRDS	-4.52978e-11
Western Europe	32	mineral	pasture_marginal	No pest, Org fert	EARTHWORMS	-9.05956e-11
Western Europe	32	mineral	pasture_marginal	No pest, Org fert	NEMATODES	-9.05956e-11
Western Europe	32	mineral	pasture_marginal	No pest, Org fert	BACTERIA	-9.05956e-11
Western Europe	12	mineral	arable	No pest, Org fert	BIRDS	4.441e-16
Western Europe	12	mineral	arable	No pest, Org fert	EARTHWORMS	8.88199e-16
Western Europe	12	mineral	arable	No pest, Org fert	NEMATODES	8.88199e-16
Western Europe	12	mineral	arable	No pest, Org fert	BACTERIA	8.88199e-16
Eastern Europe	13	mineral	pasture_marginal	No pest, Org fert	BIRDS	2.98991e-13
Eastern Europe	13	mineral	pasture_marginal	No pest, Org fert	EARTHWORMS	5.97983e-13
Eastern Europe	13	mineral	pasture_marginal	No pest, Org fert	NEMATODES	5.97983e-13
Eastern Europe	13	mineral	pasture_marginal	No pest, Org fert	BACTERIA	5.97983e-13
Eastern Europe	14	mineral	arable	No pest, Org fert	BIRDS	80.3471
Eastern Europe	14	mineral	arable	No pest, Org fert	EARTHWORMS	160.694
Eastern Europe	14	mineral	arable	No pest, Org fert	NEMATODES	160.694
Eastern Europe	14	mineral	arable	No pest, Org fert	BACTERIA	160.694
Eastern Europe	16	mineral	arable	No pest, Org fert	BIRDS	0.000156868
Eastern Europe	16	mineral	arable	No pest, Org fert	EARTHWORMS	0.000313737
Eastern Europe	16	mineral	arable	No pest, Org fert	NEMATODES	0.000313737
Eastern Europe	16	mineral	arable	No pest, Org fert	BACTERIA	0.000313737
Eastern Europe	25	mineral	arable	No pest, Org fert	BIRDS	188.759
Eastern Europe	25	mineral	arable	No pest, Org fert	EARTHWORMS	377.518
Eastern Europe	25	mineral	arable	No pest, Org fert	NEMATODES	377.518
Eastern Europe	25	mineral	arable	No pest, Org fert	BACTERIA	377.518
Eastern Europe	26	mineral	arable	No pest, Org fert	BIRDS	0.306676
Eastern Europe	26	mineral	arable	No pest, Org fert	EARTHWORMS	0.613351
Eastern Europe	26	mineral	arable	No pest, Org fert	NEMATODES	0.613351
Eastern Europe	26	mineral	arable	No pest, Org fert	BACTERIA	0.613351
Eastern Europe	28	mineral	arable	No pest, Org fert	BIRDS	0.343261
Eastern Europe	28	mineral	arable	No pest, Org fert	EARTHWORMS	0.686523
Eastern Europe	28	mineral	arable	No pest, Org fert	NEMATODES	0.686523
Eastern Europe	28	mineral	arable	No pest, Org fert	BACTERIA	0.686523
Eastern Europe	32	mineral	arable	No pest, Org fert	BIRDS	27.4303
Eastern Europe	32	mineral	arable	No pest, Org fert	EARTHWORMS	54.8607
Eastern Europe	32	mineral	arable	No pest, Org fert	NEMATODES	54.8607
Eastern Europe	32	mineral	arable	No pest, Org fert	BACTERIA	54.8607
Southern Europe	13	mineral	arable	No pest, Org fert	BIRDS	1.00536e-17
Southern Europe	13	mineral	arable	No pest, Org fert	EARTHWORMS	2.01072e-17
Southern Europe	13	mineral	arable	No pest, Org fert	NEMATODES	2.01072e-17
Southern Europe	13	mineral	arable	No pest, Org fert	BACTERIA	2.01072e-17
Southern Europe	16	mineral	arable	No pest, Org fert	BIRDS	-4.05814e-17
Southern Europe	16	mineral	arable	No pest, Org fert	EARTHWORMS	-8.11629e-17
Southern Europe	16	mineral	arable	No pest, Org fert	NEMATODES	-8.11629e-17
Southern Europe	16	mineral	arable	No pest, Org fert	BACTERIA	-8.11629e-17
Southern Europe	20	mineral	arable	No pest, Org fert	BIRDS	-1.07394e-16
Southern Europe	20	mineral	arable	No pest, Org fert	EARTHWORMS	-2.14787e-16
Southern Europe	20	mineral	arable	No pest, Org fert	NEMATODES	-2.14787e-16
Southern Europe	20	mineral	arable	No pest, Org fert	BACTERIA	-2.14787e-16
Southern Europe	21	organic	arable	No pest, Org fert	BIRDS	513.385
Southern Europe	21	organic	arable	No pest, Org fert	EARTHWORMS	1026.77
Southern Europe	21	organic	arable	No pest, Org fert	NEMATODES	1026.77
Southern Europe	21	organic	arable	No pest, Org fert	BACTERIA	1026.77
Southern Europe	25	mineral	arable	No pest, Org fert	BIRDS	2.61218
Southern Europe	25	mineral	arable	No pest, Org fert	EARTHWORMS	5.22437
Southern Europe	25	mineral	arable	No pest, Org fert	NEMATODES	5.22437
Southern Europe	25	mineral	arable	No pest, Org fert	BACTERIA	5.22437
Southern Europe	26	mineral	arable	No pest, Org fert	BIRDS	0.392134
Southern Europe	26	mineral	arable	No pest, Org fert	EARTHWORMS	0.784268
Southern Europe	26	mineral	arable	No pest, Org fert	NEMATODES	0.784268
Southern Europe	26	mineral	arable	No pest, Org fert	BACTERIA	0.784268
Southern Europe	28	mineral	arable	No pest, Org fert	BIRDS	2.91508e-16
Southern Europe	28	mineral	arable	No pest, Org fert	EARTHWORMS	5.83017e-16
Southern Europe	28	mineral	arable	No pest, Org fert	NEMATODES	5.83017e-16
Southern Europe	28	mineral	arable	No pest, Org fert	BACTERIA	5.83017e-16
Southern Europe	32	mineral	arable	No pest, Org fert	BIRDS	77.1426
Southern Europe	32	mineral	arable	No pest, Org fert	EARTHWORMS	154.285
Southern Europe	32	mineral	arable	No pest, Org fert	NEMATODES	154.285
Southern Europe	32	mineral	arable	No pest, Org fert	BACTERIA	154.285
Southern Europe	33	mineral	arable	No pest, Org fert	BIRDS	10.3208
Southern Europe	33	mineral	arable	No pest, Org fert	EARTHWORMS	20.6415
Southern Europe	33	mineral	arable	No pest, Org fert	NEMATODES	20.6415
Southern Europe	33	mineral	arable	No pest, Org fert	BACTERIA	20.6415
Southern Europe	7	mineral	arable	No pest, Org fert	BIRDS	-3.16147e-15
Southern Europe	7	mineral	arable	No pest, Org fert	EARTHWORMS	-6.32294e-15
Southern Europe	7	mineral	arable	No pest, Org fert	NEMATODES	-6.32294e-15
Southern Europe	7	mineral	arable	No pest, Org fert	BACTERIA	-6.32294e-15
Southern Europe	10	mineral	arable	No pest, Org fert	BIRDS	0.00201856
Southern Europe	10	mineral	arable	No pest, Org fert	EARTHWORMS	0.00403712
Southern Europe	10	mineral	arable	No pest, Org fert	NEMATODES	0.00403712
Southern Europe	10	mineral	arable	No pest, Org fert	BACTERIA	0.00403712
Southern Europe	12	mineral	arable	No pest, Org fert	BIRDS	0.022808
Southern Europe	12	mineral	arable	No pest, Org fert	EARTHWORMS	0.045616
Southern Europe	12	mineral	arable	No pest, Org fert	NEMATODES	0.045616
Southern Europe	12	mineral	arable	No pest, Org fert	BACTERIA	0.045616
Southern Europe	15	mineral	arable	No pest, Org fert	BIRDS	-2.0625e-15
Southern Europe	15	mineral	arable	No pest, Org fert	EARTHWORMS	-4.12499e-15
Southern Europe	15	mineral	arable	No pest, Org fert	NEMATODES	-4.12499e-15
Southern Europe	15	mineral	arable	No pest, Org fert	BACTERIA	-4.12499e-15
Southern Europe	18	mineral	arable	No pest, Org fert	BIRDS	3.20721
Southern Europe	18	mineral	arable	No pest, Org fert	EARTHWORMS	6.41442
Southern Europe	18	mineral	arable	No pest, Org fert	NEMATODES	6.41442
Southern Europe	18	mineral	arable	No pest, Org fert	BACTERIA	6.41442
Northern Europe	19	mineral	arable	No pest, Org fert	BIRDS	3.41496
Northern Europe	19	mineral	arable	No pest, Org fert	EARTHWORMS	6.82992
Northern Europe	19	mineral	arable	No pest, Org fert	NEMATODES	6.82992
Northern Europe	19	mineral	arable	No pest, Org fert	BACTERIA	6.82992
Northern Europe	21	mineral	arable	No pest, Org fert	BIRDS	9.83482e-07
Northern Europe	21	mineral	arable	No pest, Org fert	EARTHWORMS	1.96696e-06
Northern Europe	21	mineral	arable	No pest, Org fert	NEMATODES	1.96696e-06
Northern Europe	21	mineral	arable	No pest, Org fert	BACTERIA	1.96696e-06
Northern Europe	27	mineral	arable	No pest, Org fert	BIRDS	3.0039
Northern Europe	27	mineral	arable	No pest, Org fert	EARTHWORMS	6.00779
Northern Europe	27	mineral	arable	No pest, Org fert	NEMATODES	6.00779
Northern Europe	27	mineral	arable	No pest, Org fert	BACTERIA	6.00779
Northern Europe	27	organic	arable	No pest, Org fert	BIRDS	205.483
Northern Europe	27	organic	arable	No pest, Org fert	EARTHWORMS	410.965
Northern Europe	27	organic	arable	No pest, Org fert	NEMATODES	410.965
Northern Europe	27	organic	arable	No pest, Org fert	BACTERIA	410.965
Northern Europe	32	mineral	arable	No pest, Org fert	BIRDS	0.213501
Northern Europe	32	mineral	arable	No pest, Org fert	EARTHWORMS	0.427003
Northern Europe	32	mineral	arable	No pest, Org fert	NEMATODES	0.427003
Northern Europe	32	mineral	arable	No pest, Org fert	BACTERIA	0.427003
Northern Europe	33	organic	arable	No pest, Org fert	BIRDS	-9.64661e-14
Northern Europe	33	organic	arable	No pest, Org fert	EARTHWORMS	-1.92932e-13
Northern Europe	33	organic	arable	No pest, Org fert	NEMATODES	-1.92932e-13
Northern Europe	33	organic	arable	No pest, Org fert	BACTERIA	-1.92932e-13

## Sheet: Agribase_scorePractice
Western Europe	14	mineral	arable	No pest, Org fert	-2.31054e-16
Western Europe	17	mineral	arable	No pest, Org fert	-1.10385e-12
Western Europe	25	mineral	arable	No pest, Org fert	282.729
Western Europe	25	organic	arable	No pest, Org fert	6.36646e-10
Western Europe	26	mineral	arable	No pest, Org fert	2.37839
Western Europe	26	organic	arable	No pest, Org fert	7.25926
Western Europe	32	mineral	arable	No pest, Org fert	12.495
Western Europe	32	mineral	pasture_marginal	No pest, Org fert	-3.17085e-10
Western Europe	12	mineral	arable	No pest, Org fert	3.1087e-15
Eastern Europe	13	mineral	pasture_marginal	No pest, Org fert	2.09294e-12
Eastern Europe	14	mineral	arable	No pest, Org fert	562.43
Eastern Europe	16	mineral	arable	No pest, Org fert	0.00109808
Eastern Europe	25	mineral	arable	No pest, Org fert	1321.31
Eastern Europe	26	mineral	arable	No pest, Org fert	2.14673
Eastern Europe	28	mineral	arable	No pest, Org fert	2.40283
Eastern Europe	32	mineral	arable	No pest, Org fert	192.012
Southern Europe	13	mineral	arable	No pest, Org fert	7.03752e-17
Southern Europe	16	mineral	arable	No pest, Org fert	-2.8407e-16
Southern Europe	20	mineral	arable	No pest, Org fert	-7.51755e-16
Southern Europe	21	organic	arable	No pest, Org fert	3593.7
Southern Europe	25	mineral	arable	No pest, Org fert	18.2853
Southern Europe	26	mineral	arable	No pest, Org fert	2.74494
Southern Europe	28	mineral	arable	No pest, Org fert	2.04056e-15
Southern Europe	32	mineral	arable	No pest, Org fert	539.998
Southern Europe	33	mineral	arable	No pest, Org fert	72.2453
Southern Europe	7	mineral	arable	No pest, Org fert	-2.21303e-14
Southern Europe	10	mineral	arable	No pest, Org fert	0.0141299
Southern Europe	12	mineral	arable	No pest, Org fert	0.159656
Southern Europe	15	mineral	arable	No pest, Org fert	-1.44375e-14
Southern Europe	18	mineral	arable	No pest, Org fert	22.4505
Northern Europe	19	mineral	arable	No pest, Org fert	23.9047
Northern Europe	21	mineral	arable	No pest, Org fert	6.88438e-06
Northern Europe	27	mineral	arable	No pest, Org fert	21.0273
Northern Europe	27	organic	arable	No pest, Org fert	1438.38
Northern Europe	32	mineral	arable	No pest, Org fert	1.49451
Northern Europe	33	organic	arable	No pest, Org fert	-6.75263e-13
