# Supplementary material for: Enhancing biodiversity with circular food systems
Source: Research Square preprint supplement (doi:10.21203/rs.3.rs-5261909/v1), 2024-12-09
Supplement: Supplementary file 2 [file a341622d454a3aead9d3e83d.xlsx]

## Sheet: Data and factors - human read
Fam_Gustavson/Factors	Yield_loss_NP	Source	Yield_loss_NT	Source	Yield_loss_NP_NT	Source	Area spared for natural buffer areas	Source
Other	0.88	Schneider et al., 2023 - https://www.nature.com/articles/s43016-023-00834-6	1	Expert consultation - Merel Hofmeijer and Dirk van Apeldoorn	0.88	Schneider et al., 2023 and expert consultation - https://www.nature.com/articles/s43016-023-00834-6	0.8	Tscharntke et al, 2021 - https://doi.org/10.1016/j.tree.2021.06.010
Fruit & vegetables	0.896	Schneider et al., 2023 - https://www.nature.com/articles/s43016-023-00834-6	1	Expert consultation - Merel Hofmeijer and Dirk van Apeldoorn	0.896	Schneider et al., 2023 and expert consultation - https://www.nature.com/articles/s43016-023-00834-6	0.8	Tscharntke et al, 2021 - https://doi.org/10.1016/j.tree.2021.06.010
Cereals	0.921	Schneider et al., 2023 - https://www.nature.com/articles/s43016-023-00834-6	1	Expert consultation - Merel Hofmeijer and Dirk van Apeldoorn	0.786	Schneider et al., 2023 and expert consultation - https://www.nature.com/articles/s43016-023-00834-6	0.8	Tscharntke et al, 2021 - https://doi.org/10.1016/j.tree.2021.06.010
Oilseeds & pulses	0.89	Schneider et al., 2023 - https://www.nature.com/articles/s43016-023-00834-6	1	Expert consultation - Merel Hofmeijer and Dirk van Apeldoorn	0.8	Schneider et al., 2023 and expert consultation - https://www.nature.com/articles/s43016-023-00834-6	0.8	Tscharntke et al, 2021 - https://doi.org/10.1016/j.tree.2021.06.010
Roots & tubers	0.88	Schneider et al., 2023 - https://www.nature.com/articles/s43016-023-00834-6	0	Expert consultation - Merel Hofmeijer and Dirk van Apeldoorn	0	Schneider et al., 2023 and expert consultation - https://www.nature.com/articles/s43016-023-00834-6	0.8	Tscharntke et al, 2021 - https://doi.org/10.1016/j.tree.2021.06.010
Straight	0.88	Schneider et al., 2023 - https://www.nature.com/articles/s43016-023-00834-6	1	Expert consultation - Merel Hofmeijer and Dirk van Apeldoorn	0.88	Schneider et al., 2023 and expert consultation - https://www.nature.com/articles/s43016-023-00834-6	0.8	Tscharntke et al, 2021 - https://doi.org/10.1016/j.tree.2021.06.010
Grass	0.88	Schneider et al., 2023 - https://www.nature.com/articles/s43016-023-00834-6	1	Expert consultation - Merel Hofmeijer and Dirk van Apeldoorn	0.88	Schneider et al., 2023 and expert consultation - https://www.nature.com/articles/s43016-023-00834-6	0.8	Tscharntke et al, 2021 - https://doi.org/10.1016/j.tree.2021.06.010
Sources also cited in the R script
NOTES
Yield_loss_NP_NT	uses highest value shown in terms of loss
Yield_loss_NP	uses lowest value found; considers reduction of 50% of pesticide use - total lack of pesticide is hard to find and when found tends to come from biased sources (pesticide companies) - Also, shows extremely low values
When only single values were found then they were used for both columns
For the gustavson class straight, other and roots and tubers, we used the value 12% as the average for lack of data
From the paper:	7.9% for cereals, 11.0% for oilseeds and 10.4% for vegetables in Barreiro-Hurle et al.5 to reductions in production of 21.4% and 20% for cereals and oilseeds, respectively, in Henning et al.7 . Country-specific expert elicitations suggested yield reductions of 5% (France) to 10% (Germany) for wheat, 10% (Germany) to 13% (Poland) for rapeseed, 3% (France) to 15% (Germany) for sugar beets, 0% (Fran…
